# Supplementary material
Source: Springer Nature journal article supplement (https://www.springermedizin.de/resource/supplementary/12950_2006_35_MOESM2_ESM.pdf/9557798)

**A.****IL-2**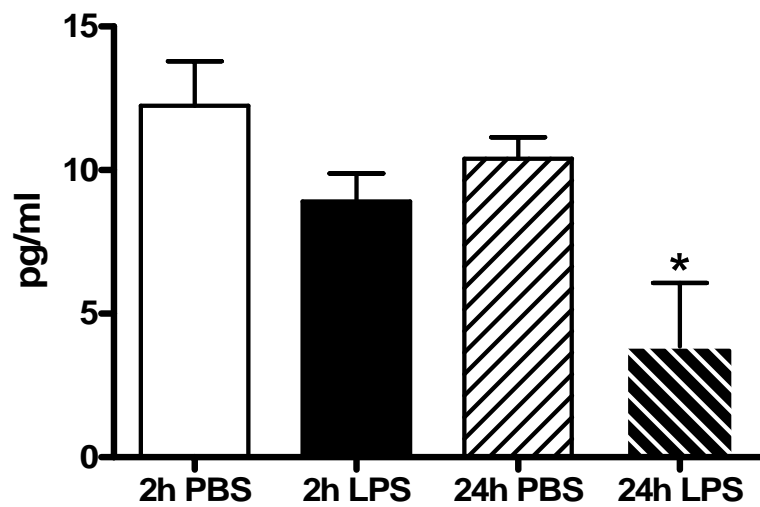**B.****IL-6**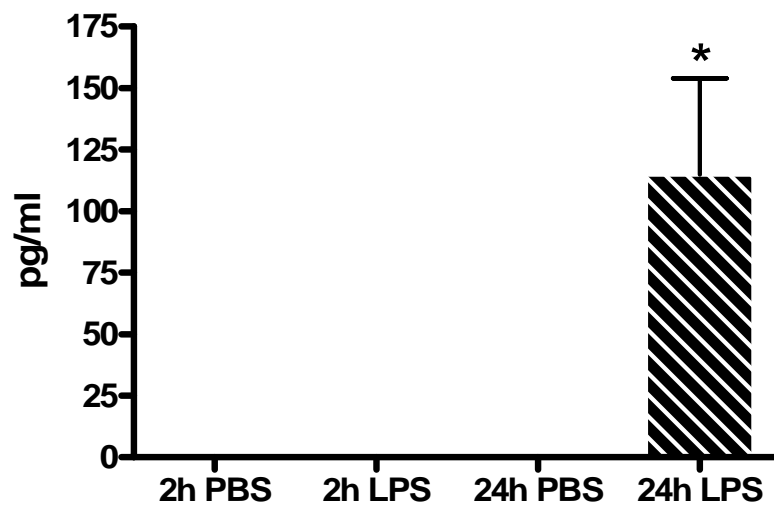**C.****GM-CSF**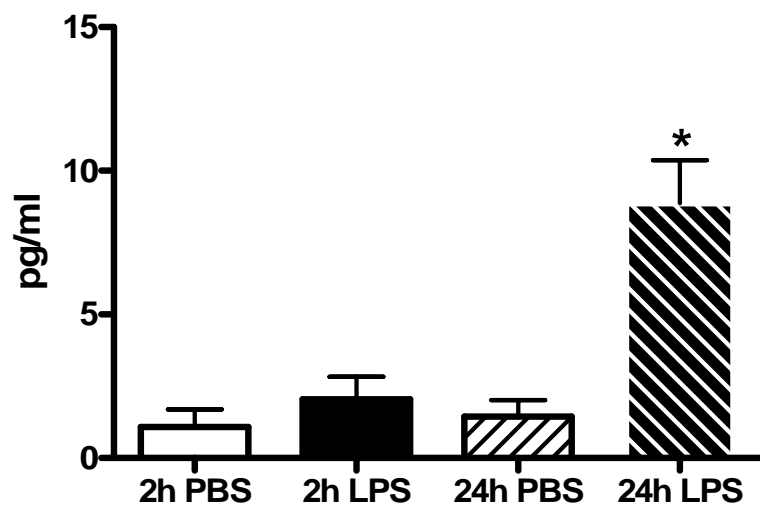

Supplement: MOESM2 [file 9557798]
